# Supplementary material for: Microphysical properties and light absorption enhancement of refractory Black carbon aerosols in the central Arctic marine boundary layer: Role of warm airmass intrusions on mixing state
Source: Copernicus journal article supplement (doi:10.5194/egusphere-2025-6493), 2026-01-21
Supplement: Supplementary file 1 [file egusphere-2025-6493-supplement.pdf]

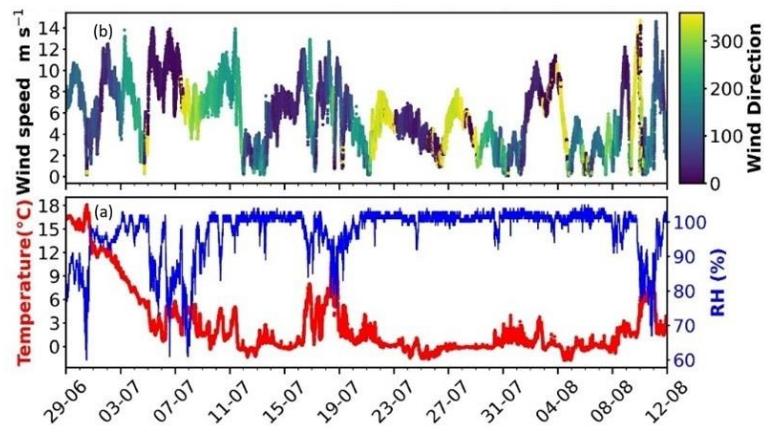

**Figure S1:** (a) Ambient temperature (red) and relative humidity (blue), (b) wind speed and wind direction measured during ATWAICE.

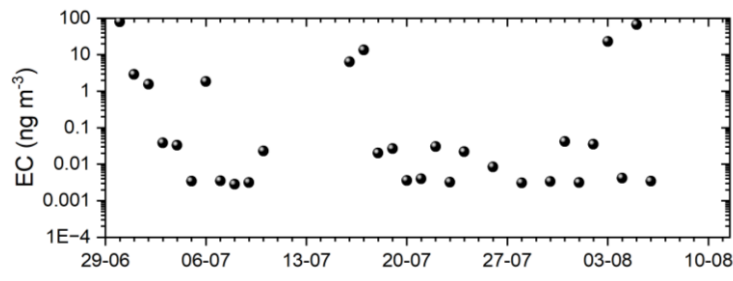

**Figure S2:** Temporal variabilities in elemental carbon concentrations measured using the thermo-optical transmission method (Birch and Cary, 1996). 0.002 ng m<sup>-3</sup> represents the detection limit of the instrument.

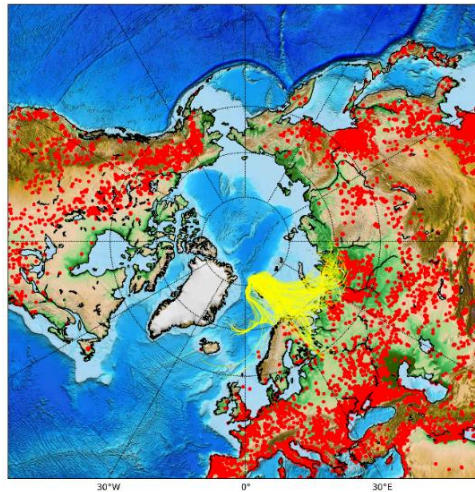

**Figure S3:** MODIS VIIRS fire pixel counts along with the hysplit air mass back trajectories during the first warm air mass intrusion period (WA1).

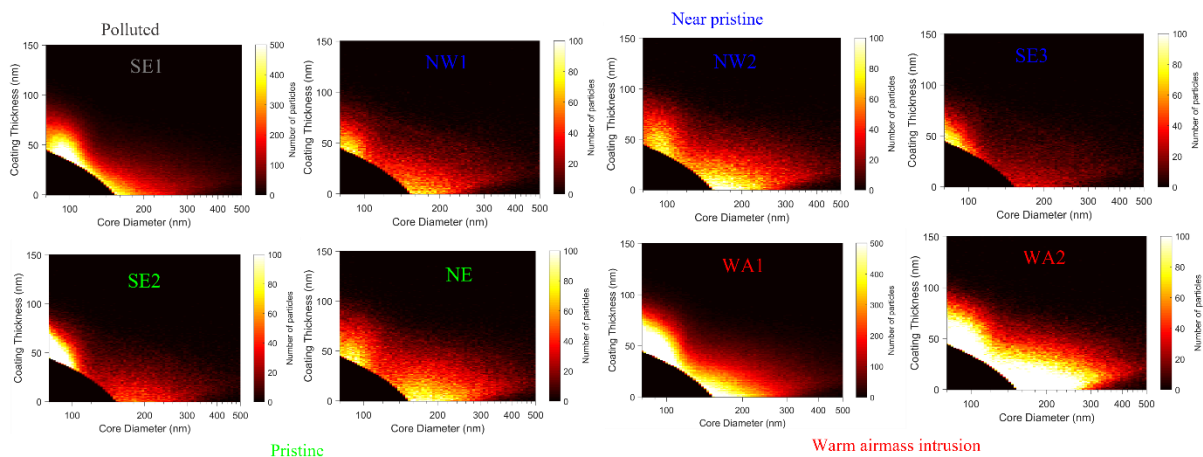

**Figure S4:** Size segregated coating thickness of rBC particles during the campaign. The colour bar indicates the number of particles in each of the size bins.

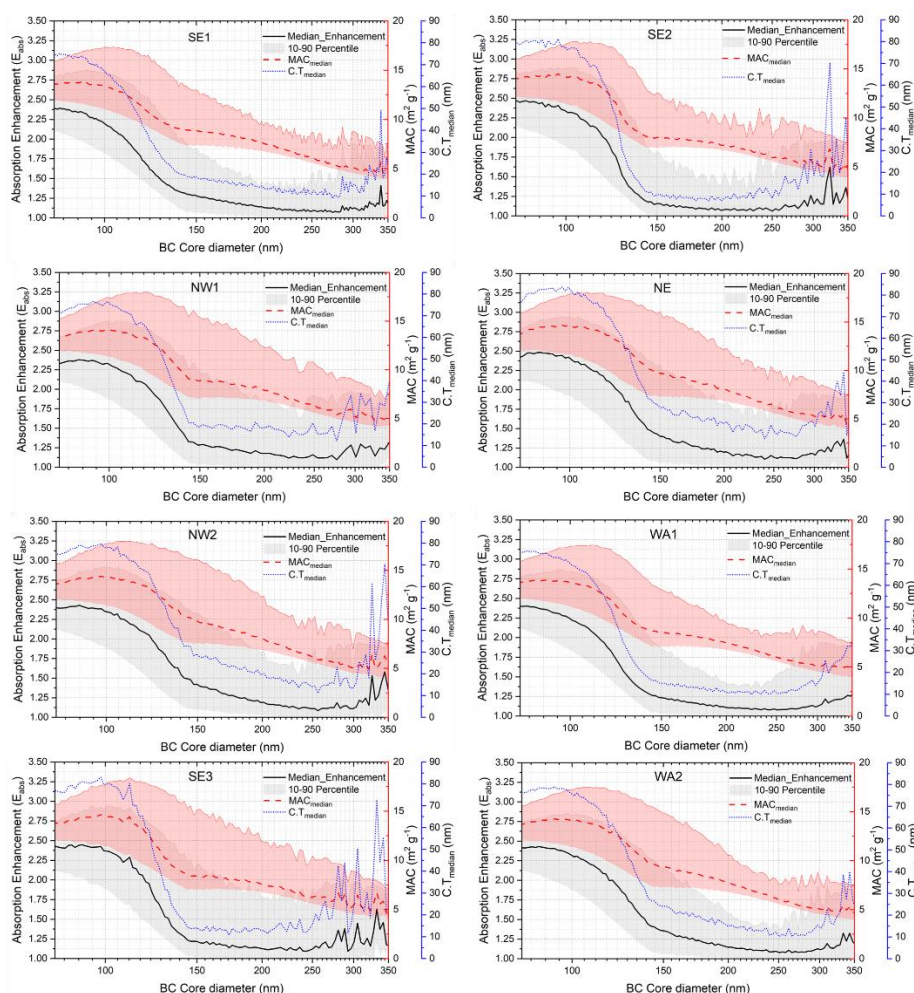

**Figure S5:** Size resolved absorption enhancement of rBC particles and Mass absorption cross section. The x-axis denotes the black carbon core diameter (nm); the y-axis (left) indicates the absorption enhancement factor, which quantifies the ratio of the absorption cross-section of coated BC particles to that of uncoated rBC cores of the same size. Median values are plotted as black solid lines, with the 10<sup>th</sup> to 90<sup>th</sup> percentile range shaded in grey to show variability.
